# Supplementary material for: Transient micropaleontological turnover across a late Eocene (Priabonian) carbon and oxygen isotope shift on Blake Nose (NW Atlantic)
Source: Copernicus journal article supplement (doi:10.5194/jm-43-303-2024), 2024-08-08
Supplement: Supplementary file 1 [file jm-43-303-2024-supplement.zip]

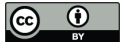

*Supplement of*

**Transient micropaleontological turnover across a late Eocene (Priabonian) carbon and oxygen isotope shift on Blake Nose (NW Atlantic)**

**Julia de Entrambasaguas et al.**

*Correspondence to:* Julia de Entrambasaguas ([jdeentrambasaguas@unizar.es](mailto:jdeentrambasaguas@unizar.es))

- [jm-43-303-2024-supplement-title-page.pdf](#)
- [Supp mat. Final\\_De\\_Entrambasaguas\\_et\\_al\\_Final](#)
  - [ODP\\_1053\\_Benthic\\_foraminifera.xlsx](#)
  - [ODP\\_1053\\_Bulkisotopes.xlsx](#)
  - [ODP\\_1053\\_Calcareous\\_Nannofossils.xlsx](#)

The copyright of individual parts of the supplement might differ from the article licence.
